# Supplementary material
Source: PubMed Central journal article supplement (PMC3331719)
Supplement: NIHMS369663-supplement-1.pdf [file NIHMS369663-supplement-1.pdf]

## SUPPLEMENTARY ONLINE DATA

# MicroRNA-138 suppresses epithelial–mesenchymal transition in squamous cell carcinoma cell lines

Xiqiang LIU\*<sup>†1</sup>, Cheng WANG\*<sup>†1</sup>, Zujian CHEN\*, Yi JIN\*, Yun WANG\*, Antonia KOLOKYTHAS\*<sup>‡§</sup>, Yang DAI<sup>§||</sup> and Xiaofeng ZHOU\*<sup>§¶2</sup>

\*Center for Molecular Biology of Oral Diseases, College of Dentistry, University of Illinois at Chicago, 801 South Paulina Street, Chicago, IL 60612, U.S.A., †Department of Oral and Maxillofacial Surgery, Guanghua School and Research Institute of Stomatology, Sun Yat-sen University, Guangzhou, Guangdong 510055, China, ‡Department of Oral and Maxillofacial Surgery, College of Dentistry, University of Illinois at Chicago, 801 South Paulina Street, Chicago, IL 60612, U.S.A., §Graduate College, University of Illinois at Chicago Cancer Center, University of Illinois at Chicago, 1801 West Taylor, Chicago, IL 60612, U.S.A., ||Department of Bioengineering, College of Engineering, University of Illinois at Chicago, 601 South Morgan Street, Chicago, IL 60607, U.S.A., and ¶Department of Periodontics, College of Dentistry, University of Illinois at Chicago, 801 South Paulina Street, Chicago, IL 60612, U.S.A.

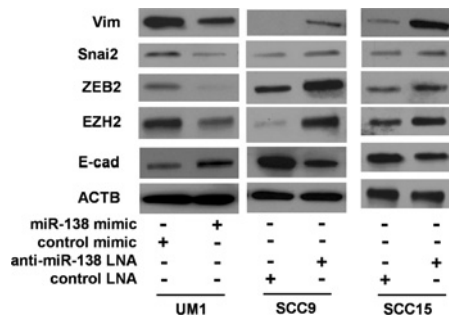

**Figure S1** Effects of miR-138 on the expression of *VIM*, *SNAI2*, *ZEB2*, *EZH2* and *E-cad* genes in additional cell lines

UM1 Cells were transfected with miR-138 mimic or negative control mimic. The SCC9 and SCC15 cells were treated with anti-miR-138 LNA or negative control LNA. The expressional changes in *Vim*, *EZH2*, *ZEB2* and *E-cad* were measured in these cells by Western blot analysis.

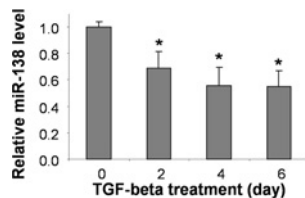

**Figure S2** TGFβ-induced down-regulation of miR-138 expression

Cells were treated with vehicle or 10 ng/ml TGFβ for 2, 4 or 6 days. The changes in miR-138 was determined using the  $2^{-\Delta\Delta CT}$  method, where U6 was used as an internal reference. \*,  $P < 0.05$ . Error bars represent S.D.

<sup>1</sup> These authors contributed equally to this work.

<sup>2</sup> To whom correspondence should be addressed (email xfzhou@uic.edu).

**Table S1 EMT-related genes ( $n = 86$ ) that are differentially regulated by miR-138**

Total RNA was derived from three independent experiments. The fold changes (miR-138 mimic-treated compared with negative mimic-treated) of genes are calculated based on the EMT-specific qRT-PCR-based array analyses. A two-tailed Student's *t* test was used and the *P* value was represented. n/d, undetectable.

| Gene symbol     | GenBank® accession number | Description                                                                                          | Fold difference | <i>P</i> value | PicTar (4-way) | PicTar (5-way) | TargetScanS | TargetScan Human 5.1 | miRanda (microrna.org) | miRanda (miRBase) | Number of positive predictions |
|-----------------|---------------------------|------------------------------------------------------------------------------------------------------|-----------------|----------------|----------------|----------------|-------------|----------------------|------------------------|-------------------|--------------------------------|
| <i>EZH2</i>     | NM_004456                 | Enhancer of zeste homologue 2 ( <i>Drosophila</i> )                                                  | 0.2434          | 0.001          | 1              | 1              | 1           |                      | 1                      | 1                 | 5                              |
| <i>SERPINE1</i> | NM_000602                 | Serpin peptidase inhibitor, clade E (nexin, plasminogen activator inhibitor type 1), member 1        | 0.3118          | 0.0092         |                |                |             |                      |                        |                   | 0                              |
| <i>PLEK2</i>    | NM_016445                 | Pleckstrin 2                                                                                         | 0.3238          | 0.0653         |                |                |             |                      |                        |                   | 0                              |
| <i>ZEB2</i>     | NM_014795                 | Zinc finger E-box binding homeobox 2                                                                 | 0.3789          | 0.0222         |                |                |             | 1                    |                        |                   | 1                              |
| <i>SNAI2</i>    | NM_003068                 | Snail homologue 2 ( <i>Drosophila</i> )                                                              | 0.4257          | 0.0012         |                |                |             |                      |                        |                   | 0                              |
| <i>MMP3</i>     | NM_002422                 | Matrix metalloproteinase 3 (stromelysin 1, progelatinase)                                            | 0.4258          | 0.0739         |                |                |             |                      |                        |                   | 0                              |
| <i>RHOC</i>     | NM_175744                 | Ras homologue gene family, member C                                                                  | 0.4353          | 0.0079         | 1              |                | 1           | 1                    | 1                      | 1                 | 5                              |
| <i>VIM</i>      | NM_003380                 | Vimentin                                                                                             | 0.483           | 0.0045         |                |                | 1           | 1                    | 1                      |                   | 3                              |
| <i>CDH2</i>     | NM_001792                 | Cadherin 2, type 1, N-cadherin (neuronal)                                                            | 0.4913          | 0.0775         |                |                |             |                      |                        |                   | 0                              |
| <i>PTK2</i>     | NM_005607                 | Protein tyrosine kinase 2                                                                            | 0.5113          | 0.0667         | 1              | 1              | 1           | 1                    |                        |                   | 4                              |
| <i>STEAP1</i>   | NM_012449                 | Six transmembrane epithelial antigen of the prostate 1                                               | 0.5216          | 0.0333         |                |                |             |                      |                        |                   | 0                              |
| <i>TFPI2</i>    | NM_006528                 | Tissue factor pathway inhibitor 2                                                                    | 0.5375          | 0.1144         |                |                |             |                      |                        |                   | 0                              |
| <i>CAMK2n1</i>  | NM_018584                 | Calcium/calmodulin-dependent protein kinase II inhibitor 1                                           | 0.5449          | 0.255          |                |                |             |                      |                        |                   | 0                              |
| <i>EGFR</i>     | NM_005228                 | Epidermal growth factor receptor [erythroblastic leukemia viral (v-erb-b) oncogene homologue, avian] | 0.548           | 0.0639         |                |                |             |                      |                        |                   | 0                              |
| <i>TGFB1</i>    | NM_000660                 | Transforming growth factor $\beta$ 1                                                                 | 0.5694          | 0.0802         |                |                |             |                      |                        |                   | 0                              |
| <i>IL1RN</i>    | NM_000577                 | Interleukin 1 receptor antagonist                                                                    | 0.5732          | 0.2398         |                |                |             |                      |                        |                   | 0                              |
| <i>OCLN</i>     | NM_002538                 | Occludin                                                                                             | 0.5819          | 0.0132         |                |                |             |                      |                        |                   | 0                              |
| <i>TCF3</i>     | NM_003200                 | Transcription factor 3 (E2A immunoglobulin enhancer binding factors E12/E47)                         | 0.603           | 0.0007         |                |                |             | 1                    | 1                      |                   | 2                              |
| <i>PPPDE2</i>   | NM_015704                 | PPPDE peptidase domain containing 2                                                                  | 0.6063          | 0.0849         |                |                |             |                      |                        |                   | 0                              |
| <i>SNAI1</i>    | NM_005985                 | Snail homologue 1 ( <i>Drosophila</i> )                                                              | 0.6199          | 0.0316         |                |                |             |                      |                        |                   | 0                              |
| <i>KRT14</i>    | NM_000526                 | Keratin 14                                                                                           | 0.6472          | 0.2713         |                |                |             |                      |                        |                   | 0                              |
| <i>NOTCH1</i>   | NM_017617                 | Notch homologue 1, translocation-associated ( <i>Drosophila</i> )                                    | 0.648           | 0.1278         |                |                |             |                      |                        |                   | 0                              |
| <i>TMEFF1</i>   | NM_003692                 | Transmembrane protein with EGF-like and two follistatin-like domains 1                               | 0.6556          | 0.1845         |                |                |             |                      |                        |                   | 0                              |
| <i>MMP9</i>     | NM_004994                 | Matrix metalloproteinase 9 (gelatinase B, 92 kDa gelatinase, 92 kDa type IV collagenase)             | 0.6883          | 0.1778         |                |                |             |                      |                        |                   | 0                              |
| <i>GSK3B</i>    | NM_002093                 | Glycogen synthase kinase 3 $\beta$                                                                   | 0.7449          | 0.2269         |                |                |             |                      |                        |                   | 0                              |
| <i>CAV2</i>     | NM_001233                 | Caveolin 2                                                                                           | 0.745           | 0.0257         |                |                |             |                      |                        |                   | 0                              |
| <i>NODAL</i>    | NM_018055                 | Nodal homologue (mouse)                                                                              | 0.7858          | 0.4738         |                |                |             |                      |                        |                   | 0                              |
| <i>SIP1</i>     | NM_003616                 | Survival of motor neuron protein-interacting protein 1                                               | 0.8105          | 0.248          |                |                |             |                      |                        |                   | 0                              |
| <i>CALD1</i>    | NM_004342                 | Caldesmon 1                                                                                          | 0.8137          | 0.4729         |                |                |             |                      |                        |                   | 0                              |
| <i>ITGA5</i>    | NM_002205                 | Integrin, $\alpha$ 5 (fibronectin receptor, $\alpha$ polypeptide)                                    | 0.8151          | 0.2809         |                |                |             |                      |                        |                   | 0                              |
| <i>MAP1B</i>    | NM_005909                 | Microtubule-associated protein 1B                                                                    | 0.8276          | 0.2825         |                |                |             |                      |                        |                   | 0                              |
| <i>ITGB1</i>    | NM_002211                 | Integrin $\beta$ 1 (fibronectin receptor, $\beta$ polypeptide, antigen CD29 includes MDF2, MSK12)    | 0.8303          | 0.1867         |                |                |             |                      |                        |                   | 0                              |

Table S1 Continued

| Gen symbol      | GenBank® accession number | Description                                                                              | Fold difference | <i>P</i> value | PicTar (4-way) | PicTar (5-way) | TargetScanS | TargetScan Human 5.1 | miRanda (microrna.org) | miRanda (miRBase) | Number of positive predictions |
|-----------------|---------------------------|------------------------------------------------------------------------------------------|-----------------|----------------|----------------|----------------|-------------|----------------------|------------------------|-------------------|--------------------------------|
| <i>AKT1</i>     | NM_005163                 | V-akt murine thymoma viral oncogene homologue 1                                          | 0.8759          | 0.3845         |                |                |             |                      | 1                      |                   | 1                              |
| <i>MMP2</i>     | NM_004530                 | Matrix metalloproteinase 2 (gelatinase A, 72 kDa gelatinase, 72 kDa type IV collagenase) | 0.882           | 0.5891         |                |                |             |                      |                        |                   | 0                              |
| <i>ILK</i>      | NM_004517                 | Integrin-linked kinase                                                                   | 0.8958          | 0.2931         |                |                |             |                      |                        |                   | 0                              |
| <i>ZEB1</i>     | NM_030751                 | Zinc finger E-box-binding homeobox 1                                                     | 0.8974          | 0.1943         |                |                |             |                      |                        |                   | 0                              |
| <i>TCF4</i>     | NM_003199                 | Transcription factor 4                                                                   | 0.9216          | 0.5438         |                |                |             | 1                    |                        |                   | 1                              |
| <i>MSN</i>      | NM_002444                 | Moesin                                                                                   | 0.9229          | 0.6739         |                |                |             |                      | 1                      |                   | 1                              |
| <i>RAC1</i>     | NM_006908                 | Ras-related C3 botulinum toxin substrate 1 (rho family, small GTP-binding protein Rac1)  | 0.9479          | 0.7117         |                |                |             |                      |                        |                   | 0                              |
| <i>NUDT13</i>   | NM_015901                 | Nudix (nucleoside diphosphate linked moiety X)-type motif 13                             | 0.9791          | 0.899          |                |                |             |                      |                        |                   | 0                              |
| <i>FN1</i>      | NM_002026                 | Fibronectin 1                                                                            | 0.9877          | 0.8472         |                |                |             |                      |                        |                   | 0                              |
| <i>PTP4A1</i>   | NM_003463                 | Protein tyrosine phosphatase type IVA, member 1                                          | 0.9942          | 0.8591         | 1              | 1              | 1           | 1                    |                        | 1                 | 5                              |
| <i>TMEM132A</i> | NM_178031                 | Transmembrane protein 132A                                                               | 1.0133          | 0.8024         |                |                |             |                      | 1                      |                   | 1                              |
| <i>DSP</i>      | NM_004415                 | Desmoplakin                                                                              | 1.0176          | 1              |                |                |             |                      | 1                      |                   | 1                              |
| <i>SOX10</i>    | NM_006941                 | SRY (sex-determining region Y)-box 10                                                    | 1.0267          | 0.5778         |                |                |             |                      |                        |                   | 0                              |
| <i>BMP1</i>     | NM_006129                 | Bone morphogenetic protein 1                                                             | 1.051           | 0.9909         |                |                |             |                      | 1                      |                   | 1                              |
| <i>MITF</i>     | NM_000248                 | Microphthalmia-associated transcription factor                                           | 1.0835          | 0.3715         |                |                |             |                      |                        |                   | 0                              |
| <i>SMAD2</i>    | NM_005901                 | SMAD family member 2                                                                     | 1.0884          | 0.4472         |                |                |             |                      |                        |                   | 0                              |
| <i>JAG1</i>     | NM_000214                 | Jagged 1 (Alagille syndrome)                                                             | 1.1339          | 0.963          |                |                |             |                      |                        |                   | 0                              |
| <i>F11R</i>     | NM_144503                 | F11 receptor                                                                             | 1.1934          | 0.3556         |                |                |             |                      |                        |                   | 0                              |
| <i>CTNNB1</i>   | NM_001904                 | Catenin (cadherin-associated protein), $\beta$ 1, 88 kDa                                 | 1.2017          | 0.1378         |                |                |             |                      |                        |                   | 0                              |
| <i>ITGAV</i>    | NM_002210                 | Integrin, $\alpha$ V (vitronectin receptor, $\alpha$ polypeptide, antigen CD51)          | 1.2314          | 0.0382         |                |                |             |                      |                        |                   | 0                              |
| <i>TIMP1</i>    | NM_003254                 | TIMP metalloproteinase inhibitor 1                                                       | 1.26            | 0.1618         |                |                |             |                      |                        |                   | 0                              |
| <i>AHNAK</i>    | NM_024060                 | AHNAK nucleoprotein                                                                      | 1.3228          | 0.6767         |                |                |             |                      |                        |                   | 0                              |
| <i>KRT7</i>     | NM_005556                 | Keratin 7                                                                                | 1.3298          | 0.0331         |                |                |             |                      |                        |                   | 0                              |
| <i>TGFB2</i>    | NM_003238                 | Transforming growth factor $\beta$ 2                                                     | 1.3303          | 0.0143         |                |                |             |                      |                        |                   | 0                              |
| <i>MST1R</i>    | NM_002447                 | Macrophage-stimulating 1 receptor (c-met-related tyrosine kinase)                        | 1.4367          | 0.0786         |                |                |             |                      |                        |                   | 0                              |
| <i>SPARC</i>    | NM_003118                 | Secreted protein, acidic, cysteine-rich (osteonectin)                                    | 1.4568          | 0.0906         |                |                |             |                      |                        |                   | 0                              |
| <i>KRT19</i>    | NM_002276                 | Keratin 19                                                                               | 1.4854          | 0.0324         |                |                |             |                      |                        |                   | 0                              |
| <i>VPS13A</i>   | NM_033305                 | Vacuolar protein sorting 13 homologue A ( <i>Saccharomyces cerevisiae</i> )              | 1.5033          | 0.1345         |                |                |             |                      |                        |                   | 0                              |
| <i>GSC</i>      | NM_173849                 | Goosecoid homeobox                                                                       | 1.5039          | 0.8061         |                |                |             |                      |                        |                   | 0                              |
| <i>WNT5A</i>    | NM_003392                 | Wingless-type MMTV integration site family, member 5A                                    | 1.5716          | 0.0085         |                |                |             |                      |                        |                   | 0                              |
| <i>DSC2</i>     | NM_004949                 | Desmocollin 2                                                                            | 1.6013          | 0.128          |                |                |             |                      |                        |                   | 0                              |
| <i>RG2</i>      | NM_002923                 | Regulator of G-protein signalling 2, 24 kDa                                              | 1.6624          | 0.0403         |                |                |             |                      |                        |                   | 0                              |
| <i>TGFB3</i>    | NM_003239                 | Transforming growth factor $\beta$ 3                                                     | 1.8351          | 0.0639         |                |                |             |                      |                        |                   | 0                              |
| <i>BMP7</i>     | NM_001719                 | Bone morphogenetic protein 7                                                             | 1.908           | 0.1751         |                |                |             |                      |                        |                   | 0                              |
| <i>FZD7</i>     | NM_003507                 | Frizzled homologue 7 ( <i>Drosophila</i> )                                               | 1.96            | 0.1053         |                |                |             |                      |                        |                   | 0                              |
| <i>STAT3</i>    | NM_003150                 | Signal transducer and activator of transcription 3 (acute-phase response factor)         | 1.971           | 0.0585         |                |                |             |                      |                        |                   | 0                              |
| <i>TWIST1</i>   | NM_000474                 | Twist homologue 1 ( <i>Drosophila</i> )                                                  | 2.0298          | 0.0087         |                |                |             |                      |                        |                   | 0                              |
| <i>IGFBP4</i>   | NM_001552                 | Insulin-like growth factor-binding protein 4                                             | 2.1158          | 0.0198         |                |                |             |                      |                        |                   | 0                              |

**Table S1 Continued**

| Gen symbol     | GenBank® accession number | Description                                                         | Fold difference | <i>P</i> value | PicTar (4-way) | PicTar (5-way) | TargetScanS | TargetScan Human 5.1 | miRanda (microrna.org) | miRanda (miRBase) | Number of positive predictions |
|----------------|---------------------------|---------------------------------------------------------------------|-----------------|----------------|----------------|----------------|-------------|----------------------|------------------------|-------------------|--------------------------------|
| <i>TSPAN13</i> | NM_014399                 | Tetraspanin 13                                                      | 2.1196          | 0.0174         |                |                |             |                      |                        |                   | 0                              |
| <i>FOXC2</i>   | NM_005251                 | Forkhead box C2 (MFH-1, mesenchyme forkhead 1)                      | 2.1292          | 0.4907         |                |                |             |                      |                        |                   | 0                              |
| <i>VCAN</i>    | NM_004385                 | Versican                                                            | 2.1428          | 0.0227         |                |                |             |                      |                        |                   | 0                              |
| <i>COL1A2</i>  | NM_000089                 | Collagen, type I, $\alpha 2$                                        | 2.2482          | 0.3691         |                |                |             |                      |                        |                   | 0                              |
| <i>SNAI3</i>   | NM_178310                 | Snail homologue 3 ( <i>Drosophila</i> )                             | 2.3426          | 0.0726         |                |                |             |                      |                        |                   | 0                              |
| <i>COL5A2</i>  | NM_000393                 | Collagen, type V, $\alpha 2$                                        | 2.3567          | 0.008          |                |                |             |                      |                        |                   | 0                              |
| <i>PDGFRB</i>  | NM_002609                 | Platelet-derived growth factor receptor, $\beta$ polypeptide        | 2.3701          | 0.0755         | 1              |                |             |                      |                        |                   | 1                              |
| <i>GNG11</i>   | NM_004126                 | Guanine nucleotide binding protein (G protein), $\gamma 11$         | 2.4643          | 0.5945         |                |                |             |                      |                        |                   | 0                              |
| <i>ERBB3</i>   | NM_001982                 | V-erb-b2 erythroblastic leukemia viral oncogene homologue 3 (avian) | 2.7155          | 0.0529         |                |                |             |                      |                        |                   | 0                              |
| <i>SPP1</i>    | NM_000582                 | Secreted phosphoprotein 1                                           | 3.6533          | 0.089          |                |                |             |                      |                        |                   | 0                              |
| <i>FGFBP1</i>  | NM_005130                 | Fibroblast growth factor binding protein 1                          | 3.9607          | 0.0412         |                |                |             |                      |                        |                   | 0                              |
| <i>WNT11</i>   | NM_004626                 | Wingless-type MMTV integration site family, member 11               | 4.1513          | 0.059          |                |                |             |                      |                        |                   | 0                              |
| <i>ESR1</i>    | NM_000125                 | Estrogen receptor 1                                                 | 4.2673          | 0.0146         | 1              | 1              |             |                      |                        |                   | 2                              |
| <i>COL3A1</i>  | NM_000090                 | Collagen, type III, $\alpha 1$                                      | 10.236          | 0.0689         |                |                |             |                      |                        |                   | 0                              |
| <i>CDH1</i>    | NM_004360                 | Cadherin 1, type 1, E-cadherin (epithelial)                         | 12.958          | 0.0377         |                |                |             |                      |                        |                   | 0                              |
| <i>WNT5B</i>   | NM_032642                 | Wingless-type MMTV integration site family, member 5B               | n/d             | n/d            |                |                |             |                      |                        |                   | 0                              |

**Table S2 EMT-related genes that were down-regulated by miR-138 were significantly enriched with predicted candidate targets of miR-138**

The set of down-regulated transcripts was significantly enriched with candidate targets of miR-138 ( $\chi^2$  test,  $P$  value = 0.0278), whereas the set of up-regulated transcripts was not enriched with the candidate targets of miR-138 ( $P$  value = 1.0). A total of nine EMT-related genes were down-regulated ( $<0.5$ -fold difference and  $P < 0.10$ ), and 14 EMT-related genes were up-regulated ( $>2$ -fold difference and  $P < 0.10$ ) as measured by TaqMan-based qRT-PCR arrays which contain 86 EMT-related genes. The targets for miR-138 were predicted using our combined approach with six bioinformatics tools listed in the Material and methods section of the main text.

|                                                  | Down-regulated by miR-138 | Up-regulated by miR-138 | Not regulated by miR-138 |
|--------------------------------------------------|---------------------------|-------------------------|--------------------------|
| Number of genes                                  | 9                         | 14                      | 63                       |
| Number of predicted miR-138 target genes         | 4                         | 2                       | 9                        |
| Percentage of genes predicted as miR-138 targets | 44.4%                     | 14.3%                   | 14.3%                    |
